6. Otake A, Sasase A, Suzuki A, Takahashi K, Sasamoto N, Miyoshi Y, Shioji M, Yamamoto Y, Adachi K: Assessment of age-specific safety of laparoscopic surgery in elderly patients with ovarian tumors. *J Obstet Gynaecol Res* 2016; 42:297–301
7. Mélot C: Contribution of multiple inert gas elimination technique to pulmonary medicine. 5. Ventilation-perfusion relationships in acute respiratory failure. *Thorax* 1994; 49:1251–8
8. Edmark L, Kostova-Aherdan K, Enlund M, Hedenstierna G: Optimal oxygen concentration during induction of general anesthesia. *ANESTHESIOLOGY* 2003; 98:28–33
9. Sum Ping SJ, Makary LF, Van Hal MD: Factors influencing oxygen store during denitrogenation in the healthy patient. *J Clin Anesth* 2009; 21:183–9
10. Rothen HU, Sporre B, Engberg G, Wegenius G, Reber A, Hedenstierna G: Prevention of atelectasis during general anaesthesia. *Lancet* 1995; 345:1387–91

## ANESTHESIOLOGY REFLECTIONS FROM THE WOOD LIBRARY-MUSEUM

# Numbing a World of Hurt: T. D. Waterbury Cruises from Cocaine to Carbolic Acid

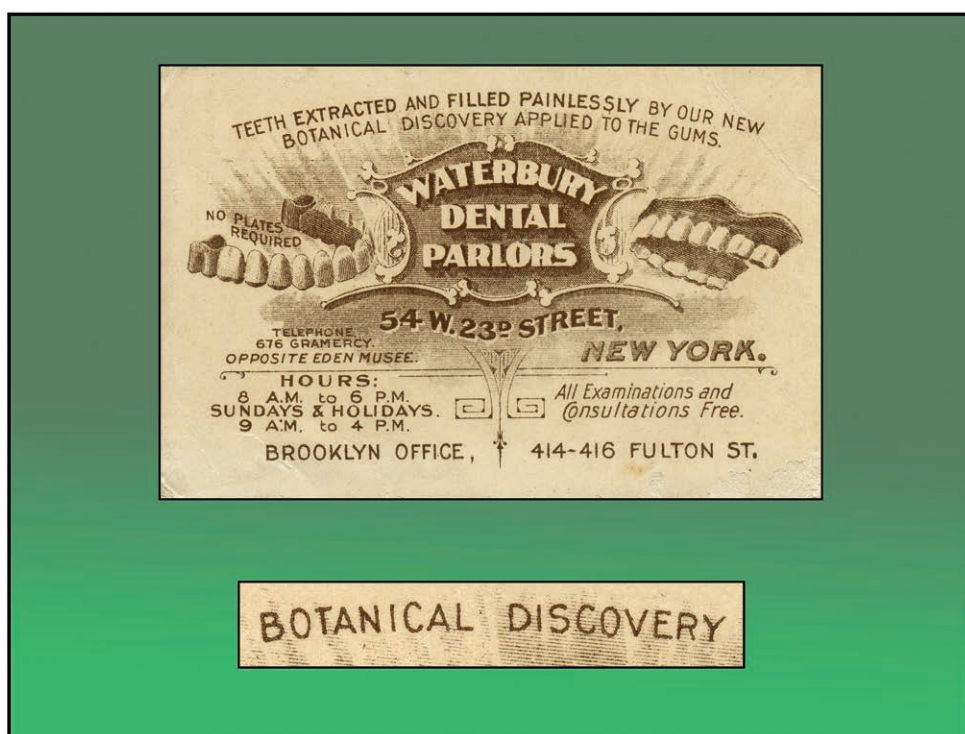

Following the discovery of cocaine's local anesthetic properties, some entrepreneurs began concocting their own proprietary compounds of topical and injectable cocaine, thereby sidestepping the expense of cocaine-laden nostrums and patent medicines. Neither a dentist nor a pharmacist, businessman Thomas D. Waterbury (1866 to 1921) launched his namesake dental chain by 1897 with a "New Botanical Discovery" (*lower*) that was compounded with something not-so-new: cocaine. His Waterbury Dental Parlors (*upper*) in Brooklyn and then Manhattan were successful enough to fund a 2-yr cruise around the world with his wife. Weeks after the global tour ended, Mr. Waterbury confirmed his business affairs were in order and that none of the 40 dentists working for him knew the formulation of his "New Botanical Discovery." Turning from venal to phenol, he checked himself into the Hotel McAlpin and committed suicide by drinking carbolic acid. (Copyright © the American Society of Anesthesiologists' Wood Library-Museum of Anesthesiology.)

*George S. Bause, M.D., M.P.H., Honorary Curator and Laureate of the History of Anesthesia, Wood Library-Museum of Anesthesiology, Schaumburg, Illinois, and Clinical Associate Professor, Case Western Reserve University, Cleveland, Ohio. UJYC@aol.com.*
